# Supplementary material for: Isotypic lanthanide–organic frameworks and scintillating films with colour-tunable X-ray radioluminescence for imaging applications
Source: Royal Society of Chemistry journal article supplement (doi:10.1039/d1dt03059k), 2021-11-24
Supplement: d1dt03059k1.pdf [file d1dt03059k1.pdf]

## Electronic Supplementary Information

# Isotypic lanthanide-organic frameworks and scintillating films with colour-tunable X-ray radioluminescence for imaging applications

Qi Gu,<sup>a,b</sup> Wenqian Wang,<sup>a</sup> Hao Lu<sup>a,c</sup>, Xi Chen<sup>a,b</sup>, Shuaihua Wang<sup>\*,a</sup> and  
Shaofan Wu<sup>a</sup>

Qi Gu: guqi@fjirsm.ac.cn

Wenqian Wang: wwq@fjirsm.ac.cn

Hao Lu: luhao@fjirsm.ac.cn

Xi Chen: xichen@fjirsm.ac.cn

Shuaihua Wang: shwang@fjirsm.ac.cn

Shaofan Wu: sfwu@fjirsm.ac.cn

<sup>a</sup>*Key Laboratory of Optoelectronic Materials Chemistry and Physics, Fujian Institute of Research on the Structure of Matter, Chinese Academy of Sciences, Fuzhou 350002, P. R. China*

<sup>b</sup>*University of Chinese Academy of Sciences, Beijing 100049, P.R. China*

<sup>c</sup>*College of Chemistry and Chemical Engineering, Fujian Normal University, Fuzhou, Fujian, 350117, P. R. China.*

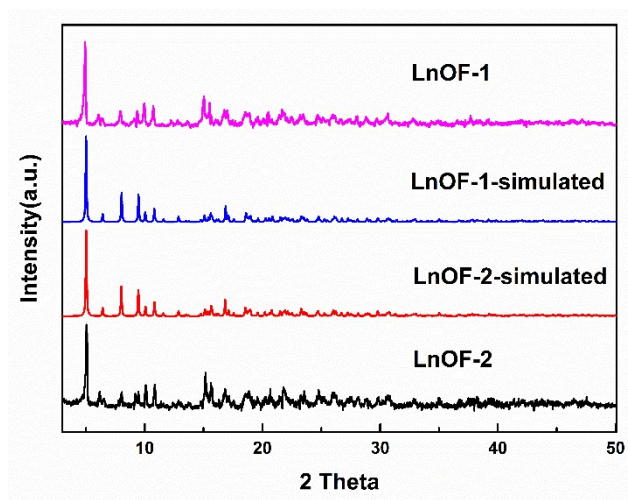

**Fig. S1** The powdered X-ray diffraction (PXRD) patterns of LnOF-1 and LnOF-2.

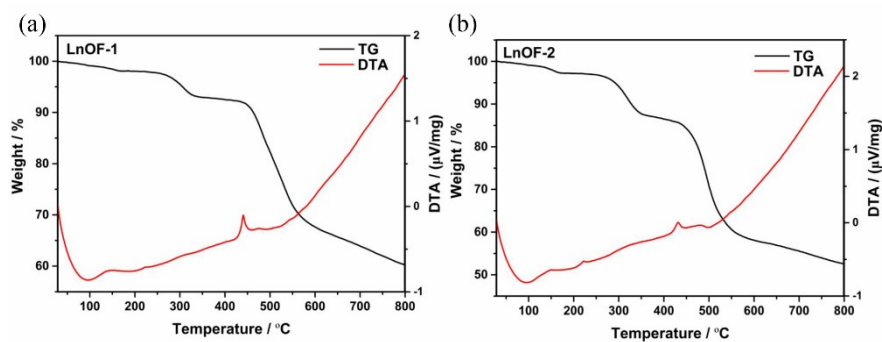

**Fig. S2** The TG&DTA curves of (a) LnOF-1 and (b) LnOF-2.

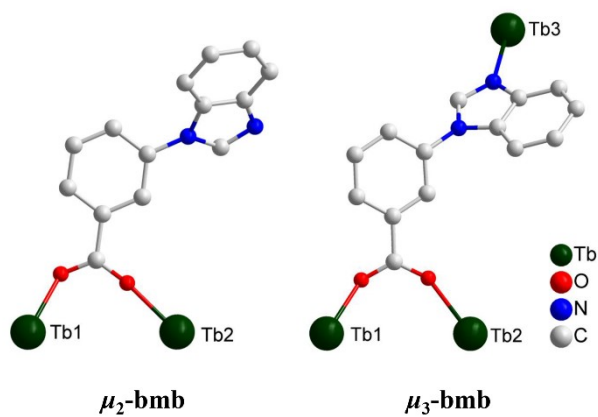

**Fig. S3** The bridging modes of bmb<sup>-</sup> ligand.

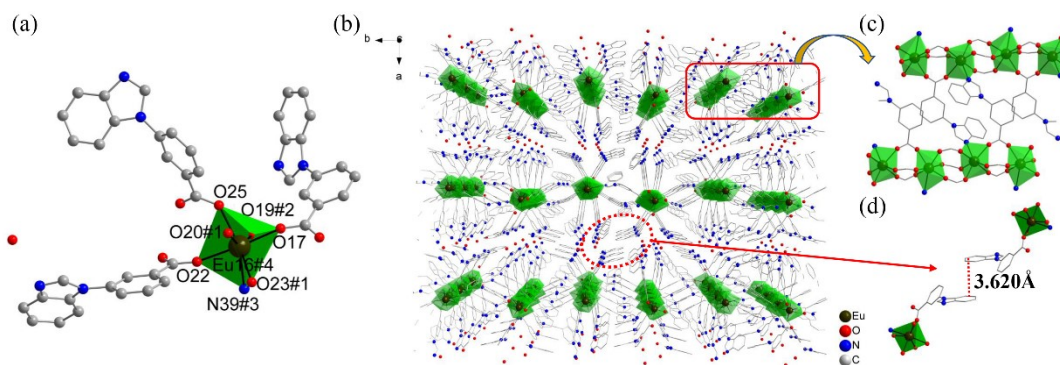

**Fig. S4** (a) The asymmetric unit of LnOF-2. The symmetric codes for compound: #1  $x, 3/2 - y, 1/2 + z$ ; #2  $x, 1/2 - y, -1/2 + z$ ; #3  $1 - x, 1/2 + y, 1/2 - z$ ; #4  $1 - x, -1/2 + y, 1/2 - z$ . (b) Illustration of the complete crystal structure of LnOF-2. (c) The coordination condition and connection mode of  $\text{Eu}^{3+}$  in the  $bc$  plane. (d) The distance between two benzimidazole groups from the adjacent layered structure is ca. 3.620 Å. Color code: Eu (olive green), O (red), N (blue), C (gray). For clarity, all hydrogen atoms are omitted.

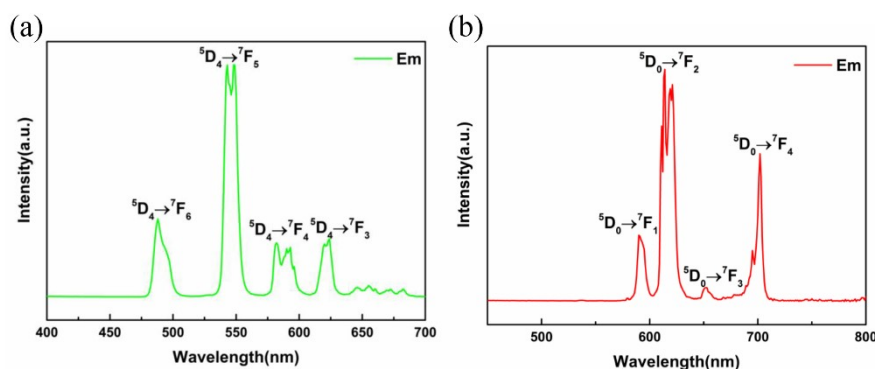

**Fig. S5** The photoluminescence spectra of (a) LnOF-1 ( $\lambda_{\text{ex}} = 314$  nm) and (b) LnOF-2 ( $\lambda_{\text{ex}} = 312$  nm).

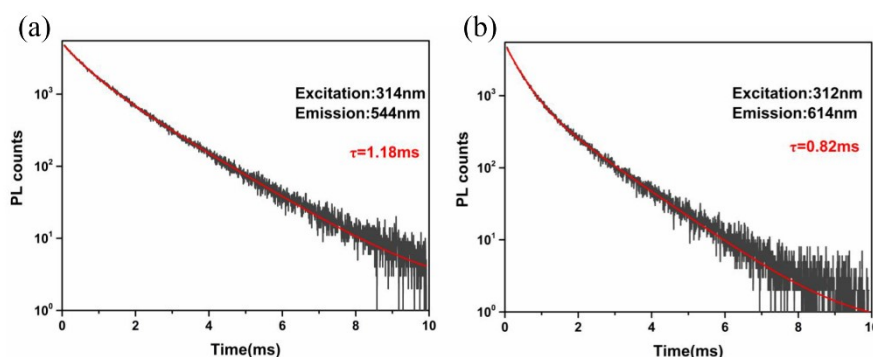

**Fig. S6** The photoluminescence decay curves of (a) LnOF-1 and (b) LnOF-2.

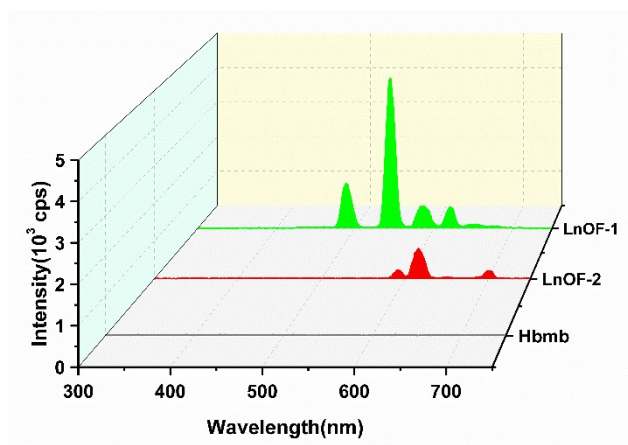

**Fig. S7** The XEL spectra of Hbmb ligand, LnOF-1 and LnOF-2 with the X-ray tube voltage of 50 kV and the tube current of 100  $\mu$ A.

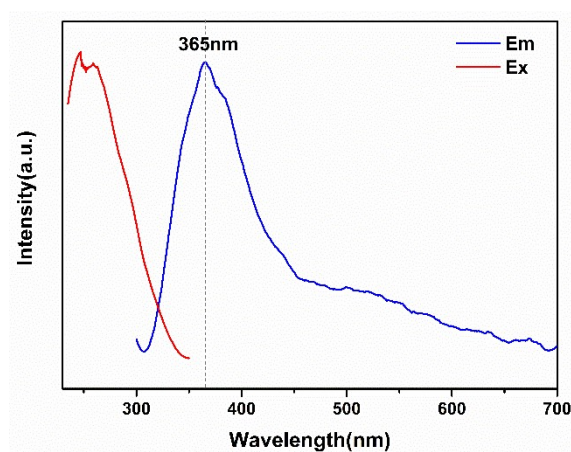

**Fig. S8** The PL/PLE spectrum of Hbmb ligand.

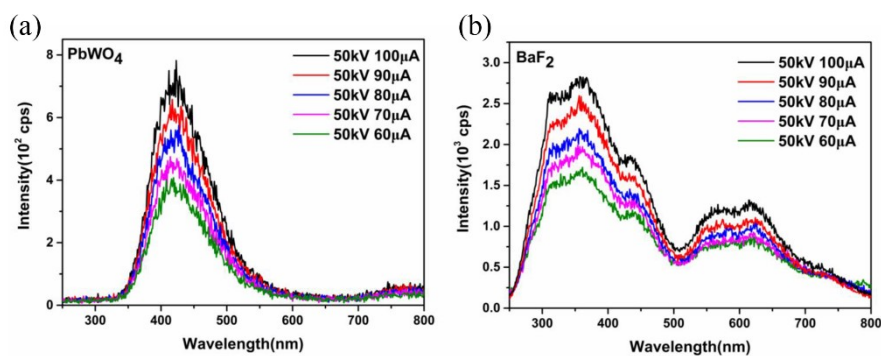

**Fig. S9** The XEL spectra of powdered (a)  $\text{PbWO}_4$  and (b)  $\text{BaF}_2$  under exposure of X-ray tube with voltage fixed at 50 kV, current ranging from 60 to 100  $\mu$ A.

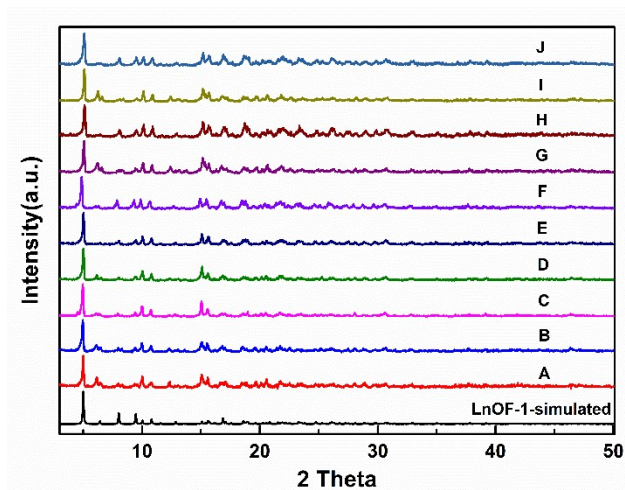

**Fig. S10** The powdered X-ray diffraction (PXRD) patterns of  $\text{Eu}_x\text{Tb}_{1-x}\text{-LnOFs}$ . A~J represent that the doping ratios of  $\text{Eu}^{3+}$  and  $\text{Tb}^{3+}$  are 0.1% : 99.9%, 0.3% : 99.7%, 0.5% : 99.5%, 0.8% : 99.2%, 1% : 99%, 2% : 98%, 3% : 97%, 5% : 95%, 8% : 92% and 10% : 90%, respectively.

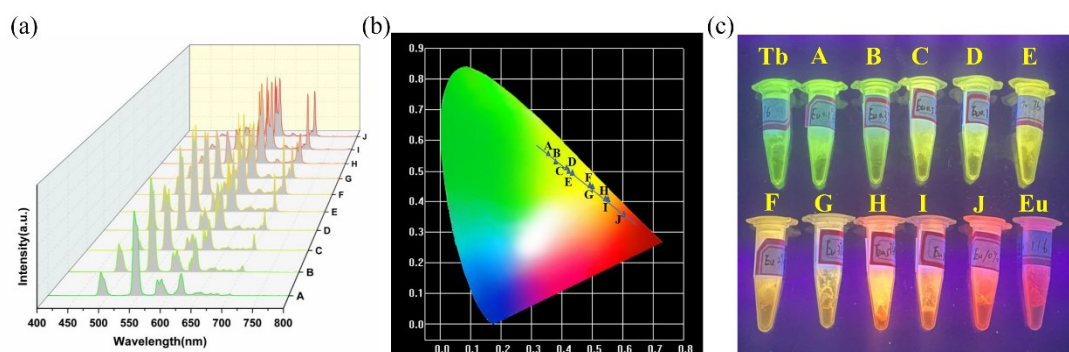

**Fig. S11** (a) The photoluminescence spectra of  $\text{Eu}_x\text{Tb}_{1-x}\text{-LnOFs}$  ( $\lambda_{\text{ex}} = 312 \text{ nm}$ ). (b) Linear CIE chromaticity diagram of photoluminescence for  $\text{Eu}_x\text{Tb}_{1-x}\text{-LnOFs}$ . (c) The photograph of  $\text{Eu}_x\text{Tb}_{1-x}\text{-LnOFs}$  under UV lamp.

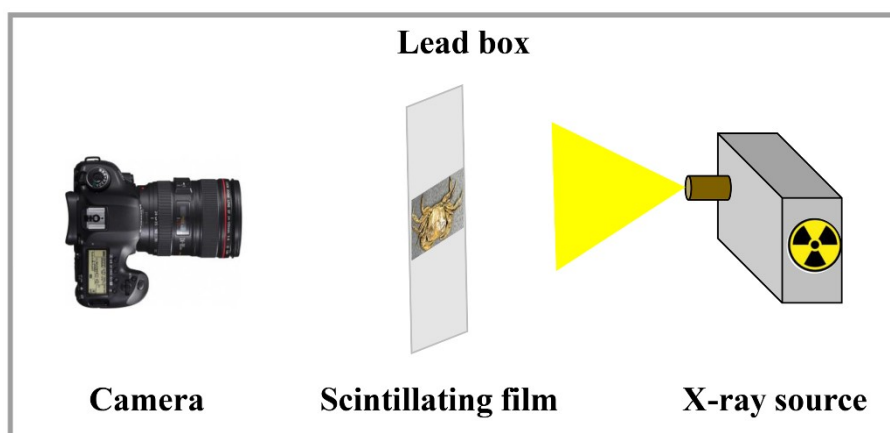

**Fig. S12** Schematic diagram of the self-built X-ray imaging system.

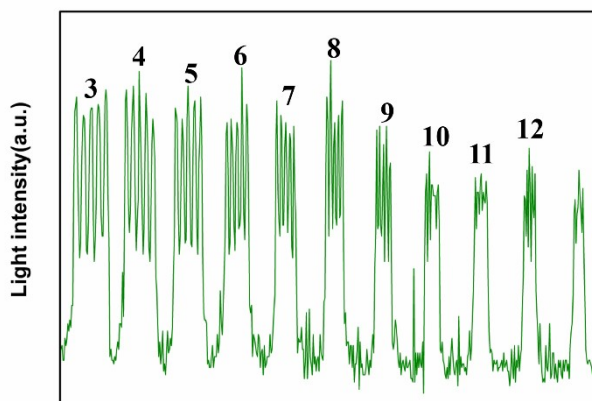

**Fig. S13** The light intensity values corresponding to bright ( $I_{\max}$ ) and dark ( $I_{\min}$ ) stripes of each line pair.

**Table S1** Crystallographic data for compounds.

| Crystal data                                 | LnOF-1                 | LnOF-2                 |
|----------------------------------------------|------------------------|------------------------|
| CCDC number                                  | 2108315                | 2108316                |
| Empirical formula                            | $C_{42}H_{29}N_6O_7Tb$ | $C_{42}H_{29}N_6O_7Eu$ |
| Formula weight                               | 888.64                 | 881.68                 |
| Temperature                                  | 293(2)                 | 293(2)                 |
| Wavelength ( $\text{\AA}$ ) / $MoK_{\alpha}$ | 1.3405                 | 1.3405                 |
| Crystal system                               | monoclinic             | monoclinic             |
| Space group                                  | $P2_1/c$               | $P2_1/c$               |
| $a$ ( $\text{\AA}$ )                         | 17.6637(2)             | 17.6275(11)            |
| $b$ ( $\text{\AA}$ )                         | 22.0021(2)             | 22.066(1)              |
| $c$ ( $\text{\AA}$ )                         | 9.5719(1)              | 9.6033(4)              |
| $\alpha$ ( $^{\circ}$ )                      | 90                     | 90                     |
| $\beta$ ( $^{\circ}$ )                       | 94.459(1)              | 94.622(5)              |
| $\gamma$ ( $^{\circ}$ )                      | 90                     | 90                     |
| $V$ ( $\text{\AA}^3$ )                       | 3708.75(7)             | 3723.2(3)              |
| $Z$                                          | 4                      | 4                      |
| <i>Calcd.</i> density ( $\text{g cm}^{-3}$ ) | 1.592                  | 1.573                  |
| Absorption coefficient ( $\text{mm}^{-1}$ )  | 10.221                 | 9.114                  |
| )                                            |                        |                        |
| $F(000)$                                     | 1776                   | 1768                   |
| Reflections collected                        | 46785                  | 47746                  |
| Completeness to $\theta = 53.54^{\circ}$     | 98.6%                  | 98.6%                  |
| Data/restraints/parameters                   | 8420/0/508             | 7387/3/512             |

|                                        |                 |                 |
|----------------------------------------|-----------------|-----------------|
| Goodness-of-fit on $F^2$               | 1.015           | 1.071           |
| Final $R$ indices [ $I > 2\sigma(I)$ ] | $R_1 = 0.0303$  | $R_1 = 0.0334$  |
|                                        | $wR_2 = 0.0759$ | $wR_2 = 0.0883$ |

$${}^aR_1 = \sum(F_o - F_c)/\sum F_o, {}^b wR_2 = [\sum w(F_o^2 - F_c^2)^2/\sum w(F_o^2)^2]^{1/2}.$$

**Table S2** The  $Z_{\text{eff}}$  values (Tables S2†) of LnOF-1, LnOF-2 and some traditional inorganic scintillator materials.

| Compounds                                       | $Z_{\text{eff}}$ |
|-------------------------------------------------|------------------|
| LnOF-1                                          | 42.27            |
| LnOF-2                                          | 40.60            |
| PbWO <sub>4</sub>                               | 75.6             |
| BaF <sub>2</sub>                                | 52.7             |
| Bi <sub>4</sub> Ge <sub>3</sub> O <sub>12</sub> | 75.2             |

Empirical formulas (for a compound  $A_xB_yC_z$ ):

$$Z_{\text{eff}} = [(xM_aZ_a^4 + yM_bZ_b^4 + zM_cZ_c^4)/(xM_a + yM_b + zM_c)]^{1/4}$$

where  $M_a$ ,  $M_b$  and  $M_c$  are the atomic masses of A, B and C, respectively;  $Z_a$ ,  $Z_b$  and  $Z_c$  are atomic numbers of A, B and C, respectively.

LnOF-1 (C<sub>42</sub>H<sub>29</sub>N<sub>6</sub>O<sub>7</sub>Tb):

$$Z_{\text{eff}} = [(42 \times 12.01 \times 6^4 + 29 \times 1.008 \times 1^4 + 6 \times 14.007 \times 7^4 + 7 \times 16.00 \times 8^4 + 1 \times 158.923 \times 65^4) / (42 \times 12.01 + 29 \times 1.008 + 6 \times 14.007 + 7 \times 16.00 + 1 \times 158.923)]^{1/4} = 42.27$$

LnOF-2 (C<sub>42</sub>H<sub>29</sub>N<sub>6</sub>O<sub>7</sub>Eu):

$$Z_{\text{eff}} = [(42 \times 12.01 \times 6^4 + 29 \times 1.008 \times 1^4 + 6 \times 14.007 \times 7^4 + 7 \times 16.00 \times 8^4 + 1 \times 151.964 \times 63^4) / (42 \times 12.01 + 29 \times 1.008 + 6 \times 14.007 + 7 \times 16.00 + 1 \times 151.964)]^{1/4} = 40.60$$
